# Supplementary material for: Spousal associations of serum metabolomic profiles by nuclear magnetic resonance spectroscopy
Source: PubMed Central journal article supplement (PMC8566506; doi:10.1038/s41598-021-00531-z), 2021-11-03

## **SUPPLEMENTARY MATERIAL**

### **Spousal associations of serum metabolomic profiles by nuclear magnetic resonance spectroscopy**

Karema Al Rashid MBChB<sup>1†</sup>, Neil Goulding PhD<sup>2,3†</sup>, Amy Taylor PhD<sup>2,3,4</sup>, Mary Ann Lumsden MD<sup>1</sup>,  
Deborah A Lawlor PhD<sup>2,3,4\*</sup>, Scott M Nelson PhD<sup>1,4\*</sup>

<sup>1</sup> School of Medicine, University of Glasgow, UK G31 2ER

<sup>2</sup> MRC Integrative Epidemiology Unit at the University of Bristol, UK BS8 2BN

<sup>3</sup> Population Health Science, Bristol Medical School, UK

<sup>4</sup> NIHR Bristol Biomedical Research Centre, Bristol, UK

† Joint first authors

\* Joint senior authors

| <b>Content</b> | <b>Page(s)</b> | <b>Description</b>                                                                            |
|----------------|----------------|-----------------------------------------------------------------------------------------------|
| <b>Tables</b>  |                |                                                                                               |
| Table S1       | 3              | List of NMR metabolomic measures assessed in this study, with their units of quantification   |
| <b>Figures</b> |                |                                                                                               |
| Figure S1      | 10             | Spearman correlations of metabolic measures in couples awaiting IVF                           |
| Figure S2      | 13             | Adjusted correlations of metabolic measures in couples awaiting IVF using linear regression   |
| Figure S3      | 16             | Adjusted correlations of metabolic measures in couples awaiting IVF using quantile regression |

**Table S1: NMR metabolic measures**

| <b>Molecular class</b>      | <b>Lipid, lipoprotein or metabolite name</b>                     | <b>Units*</b> |
|-----------------------------|------------------------------------------------------------------|---------------|
| <b>Extremely large VLDL</b> | Concentration of chylomicrons and extremely large VLDL particles | mol/l         |
|                             | Total lipids in chylomicrons and extremely large VLDL            | mmol/l        |
|                             | Phospholipids in chylomicrons and extremely large VLDL           | mmol/l        |
|                             | Total cholesterol in chylomicrons and extremely large VLDL       | mmol/l        |
|                             | Free cholesterol in chylomicrons and extremely large VLDL        | mmol/l        |
|                             | Triglycerides in chylomicrons and extremely large VLDL           | mmol/l        |
| <b>Very large VLDL</b>      | Concentration of very large VLDL particles                       | mol/l         |
|                             | Total lipids in very large VLDL                                  | mmol/l        |
|                             | Phospholipids in very large VLDL                                 | mmol/l        |
|                             | Total cholesterol in very large VLDL                             | mmol/l        |
|                             | Cholesterol esters in very large VLDL                            | mmol/l        |
|                             | Free cholesterol in very large VLDL                              | mmol/l        |
|                             | Triglycerides in very large VLDL                                 | mmol/l        |
| <b>Large VLDL</b>           | Concentration of large VLDL particles                            | mol/l         |
|                             | Total lipids in large VLDL                                       | mmol/l        |
|                             | Phospholipids in large VLDL                                      | mmol/l        |
|                             | Total cholesterol in large VLDL                                  | mmol/l        |
|                             | Cholesterol esters in large VLDL                                 | mmol/l        |
|                             | Free cholesterol in large VLDL                                   | mmol/l        |
|                             | Triglycerides in large VLDL                                      | mmol/l        |
| <b>Medium VLDL</b>          | Concentration of large VLDL particles                            | mol/l         |
|                             | Total lipids in small VLDL                                       | mmol/l        |
|                             | Phospholipids in small VLDL                                      | mmol/l        |
|                             | Total cholesterol in small VLDL                                  | mmol/l        |
|                             | Cholesterol esters in small VLDL                                 | mmol/l        |
|                             | Free cholesterol in small VLDL                                   | mmol/l        |
|                             | Triglycerides in small VLDL                                      | mmol/l        |
| <b>Small VLDL</b>           | Concentration of very small VLDL particles                       | mol/l         |
|                             | Total lipids in very small VLDL                                  | mmol/l        |
|                             | Phospholipids in very small VLDL                                 | mmol/l        |
|                             | Total cholesterol in very small VLDL                             | mmol/l        |
|                             | Cholesterol esters in very small VLDL                            | mmol/l        |
|                             | Free cholesterol in very small VLDL                              | mmol/l        |
|                             | Triglycerides in very small VLDL                                 | mmol/l        |
| <b>IDL</b>                  | Concentration of IDL particles                                   | mol/l         |
|                             | Total lipids in IDL                                              | mmol/l        |
|                             | Phospholipids in IDL                                             | mmol/l        |
|                             | Total cholesterol in IDL                                         | mmol/l        |
|                             | Cholesterol esters in IDL                                        | mmol/l        |
|                             | Free cholesterol in IDL                                          | mmol/l        |
|                             | Triglycerides in IDL                                             | mmol/l        |
| <b>Large LDL</b>            | Concentration of large LDL particles                             | mol/l         |

|                       |                                           |        |
|-----------------------|-------------------------------------------|--------|
|                       | Total lipids in large LDL                 | mmol/l |
|                       | Phospholipids in large LDL                | mmol/l |
|                       | Total cholesterol in large LDL            | mmol/l |
|                       | Cholesterol esters in large LDL           | mmol/l |
|                       | Free cholesterol in large LDL             | mmol/l |
|                       | Triglycerides in large LDL                | mmol/l |
| <b>Medium LDL</b>     | Concentration of medium LDL particles     | mol/l  |
|                       | Total lipids in medium LDL                | mmol/l |
|                       | Phospholipids in medium LDL               | mmol/l |
|                       | Total cholesterol in medium LDL           | mmol/l |
|                       | Cholesterol esters in medium LDL          | mmol/l |
|                       | Free cholesterol in medium LDL            | mmol/l |
|                       | Triglycerides in medium LDL               | mmol/l |
| <b>Small LDL</b>      | Concentration of small LDL particles      | mol/l  |
|                       | Total lipids in small LDL                 | mmol/l |
|                       | Phospholipids in small LDL                | mmol/l |
|                       | Total cholesterol in small LDL            | mmol/l |
|                       | Cholesterol esters in small LDL           | mmol/l |
|                       | Free cholesterol in small LDL             | mmol/l |
|                       | Triglycerides in small LDL                | mmol/l |
| <b>Very large HDL</b> | Concentration of very large HDL particles | mol/l  |
|                       | Total lipids in very large HDL            | mmol/l |
|                       | Phospholipids in very large HDL           | mmol/l |
|                       | Total cholesterol in very large HDL       | mmol/l |
|                       | Cholesterol esters in very large HDL      | mmol/l |
|                       | Free cholesterol in very large HDL        | mmol/l |
|                       | Triglycerides in very large HDL           | mmol/l |
| <b>Large HDL</b>      | Concentration of large HDL particles      | mol/l  |
|                       | Total lipids in large HDL                 | mmol/l |
|                       | Phospholipids in large HDL                | mmol/l |
|                       | Total cholesterol in large HDL            | mmol/l |
|                       | Cholesterol esters in large HDL           | mmol/l |
|                       | Free cholesterol in large HDL             | mmol/l |
|                       | Triglycerides in large HDL                | mmol/l |
| <b>Medium HDL</b>     | Concentration of medium HDL particles     | mol/l  |
|                       | Total lipids in medium HDL                | mmol/l |
|                       | Phospholipids in medium HDL               | mmol/l |
|                       | Total cholesterol in medium HDL           | mmol/l |
|                       | Cholesterol esters in medium HDL          | mmol/l |
|                       | Free cholesterol in medium HDL            | mmol/l |
|                       | Triglycerides in medium HDL               | mmol/l |
| <b>Small HDL</b>      | Concentration of small HDL particles      | mol/l  |
|                       | Total lipids in small HDL                 | mmol/l |
|                       | Phospholipids in small HDL                | mmol/l |
|                       | Total cholesterol in small HDL            | mmol/l |
|                       | Cholesterol esters in small HDL           | mmol/l |
|                       | Free cholesterol in small HDL             | mmol/l |

|                                                                   |                                                           |        |
|-------------------------------------------------------------------|-----------------------------------------------------------|--------|
|                                                                   | Triglycerides in small HDL                                | mmol/l |
| <b>Lipoprotein particle size</b>                                  | Mean diameter for VLDL particles                          | nm     |
|                                                                   | Mean diameter for LDL particles                           | nm     |
|                                                                   | Mean diameter for HDL particles                           | nm     |
| <b>Cholesterol concentrations</b>                                 | Total cholesterol                                         | mmol/l |
|                                                                   | Total cholesterol in VLDL                                 | mmol/l |
|                                                                   | Remnant cholesterol (non-HDL and non-LDL cholesterol)     | mmol/l |
|                                                                   | Total cholesterol in LDL                                  | mmol/l |
|                                                                   | Total cholesterol in HDL                                  | mmol/l |
|                                                                   | Total cholesterol in HDL2                                 | mmol/l |
|                                                                   | Total cholesterol in HDL3                                 | mmol/l |
|                                                                   | Esterified cholesterol                                    | mmol/l |
|                                                                   | Free cholesterol                                          | mmol/l |
| <b>Glycerides and phospholipid concentrations (and one ratio)</b> | Total triglycerides                                       | mmol/l |
|                                                                   | Triglycerides in VLDL                                     | mmol/l |
|                                                                   | Triglycerides in LDL                                      | mmol/l |
|                                                                   | Triglycerides in HDL                                      | mmol/l |
|                                                                   | Total phosphoglycerides                                   | mmol/l |
|                                                                   | Ratio of triglycerides to phosphoglycerides               |        |
|                                                                   | Phosphatidylcholine and other cholines                    | mmol/l |
|                                                                   | Sphingomyelins                                            | mmol/l |
|                                                                   | Total cholines                                            | mmol/l |
| <b>Apolipoprotein concentrations (and one ratio)</b>              | Apolipoprotein A-1                                        | g/l    |
|                                                                   | Apolipoprotein B                                          | g/l    |
| <b>Fatty acid concentrations</b>                                  | Total fatty acids                                         | mmol/l |
|                                                                   | Estimated degree of saturation                            |        |
|                                                                   | 22:6, docosaheptaenoic acid                               | mmol/l |
|                                                                   | 18:2 linoleic acid                                        | mmol/l |
|                                                                   | Omega-3 fatty acids                                       | mmol/l |
|                                                                   | Omega-6 fatty acids                                       | mmol/l |
|                                                                   | Polyunsaturated fatty acids                               | mmol/l |
|                                                                   | Monounsaturated fatty acids; 16:1, 18:1                   | mmol/l |
|                                                                   | Saturated fatty acids                                     | mmol/l |
| <b>Fatty acid ratios</b>                                          | Ratio of 22:6, docosaheptaenoic acid to total fatty acids | %      |
|                                                                   | Ratio of 18:2 linoleic acid to total fatty acids          | %      |
|                                                                   | Ratio of omega-3 fatty acids to total fatty acids         | %      |
|                                                                   | Ratio of omega-6 fatty acids to total fatty acids         | %      |
|                                                                   | Ratio of polyunsaturated fatty acids to total fatty acids | %      |
|                                                                   | Ratio of monounsaturated fatty acids to total fatty acids | %      |
|                                                                   | Ratio of saturated fatty acids to total fatty acids       | %      |
| <b>Glycolysis related metabolite</b>                              | Glucose                                                   | mmol/l |
|                                                                   | Lactate                                                   | mmol/l |
|                                                                   | Pyruvate                                                  | mmol/l |
|                                                                   | Citrate                                                   | mmol/l |
|                                                                   | Glycerol                                                  | mmol/l |
|                                                                   | Alanine                                                   | mmol/l |

|                                   |                                                   |        |
|-----------------------------------|---------------------------------------------------|--------|
|                                   | Glutamine                                         | mmol/l |
| <b>Amino acid concentrations</b>  | Glycine                                           | mmol/l |
|                                   | Histidine                                         | mmol/l |
| branched                          | Isoleucine                                        | mmol/l |
| branched                          | Leucine                                           | mmol/l |
| branched                          | Valine                                            | mmol/l |
| aromatic                          | Phenylalanine                                     | mmol/l |
| aromatic                          | Tyrosine                                          | mmol/l |
| <b>Ketone body concentrations</b> | Acetate                                           | mmol/l |
|                                   | Acetoacetate                                      | mmol/l |
|                                   | 3-hydroxybutyrate                                 | mmol/l |
| <b>Fluid balance marker</b>       | Albumin                                           | mmol/l |
|                                   | Creatinine                                        | mmol/l |
| <b>Inflammation marker</b>        | Glycoprotein acetyls, mainly a1-acid glycoprotein | mmol/l |

\* These are the units used throughout the paper for each of the metabolic measures, unless we state that we are presenting results in standard deviation (SD) units. Where we present results that are the mean (in control participants) at 16-weeks these are the units. Where we present change in metabolic marker (between 16- to 36-weeks) or difference in change of metabolic markers the units are those listed in the table above per one week of gestational age.

VLDL: very low density lipoprotein; LDL: low density lipoprotein; IDL: intermediate density lipoprotein; HDL: high density lipoprotein

## Supplementary Figures

Supplemental Figure S1. Spearman correlations of metabolic measures in couples awaiting IVF.

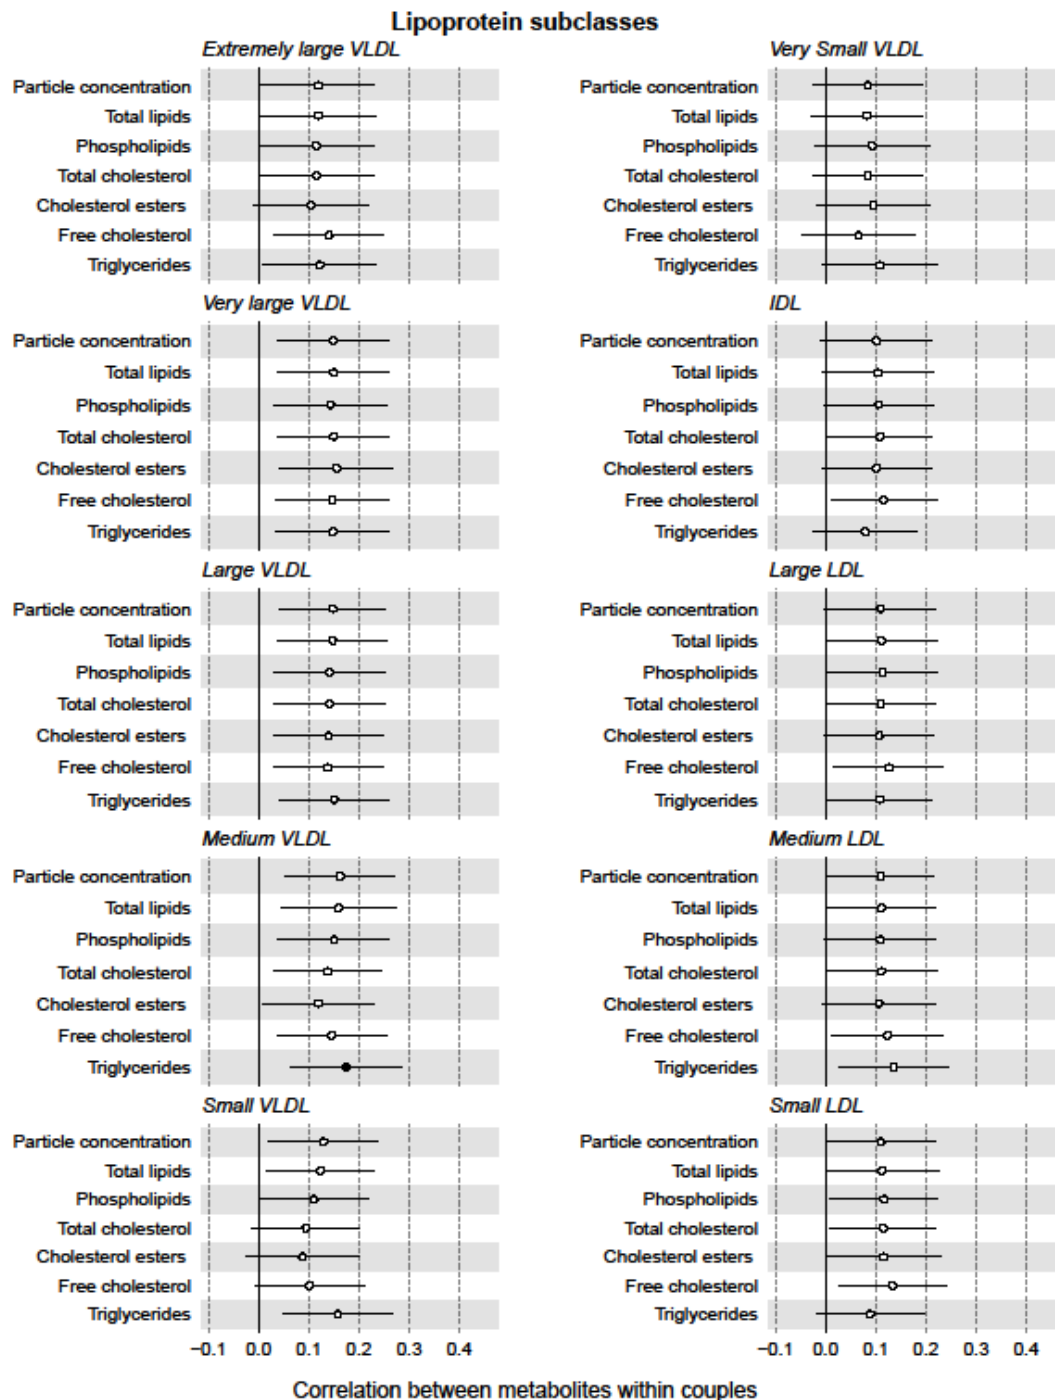

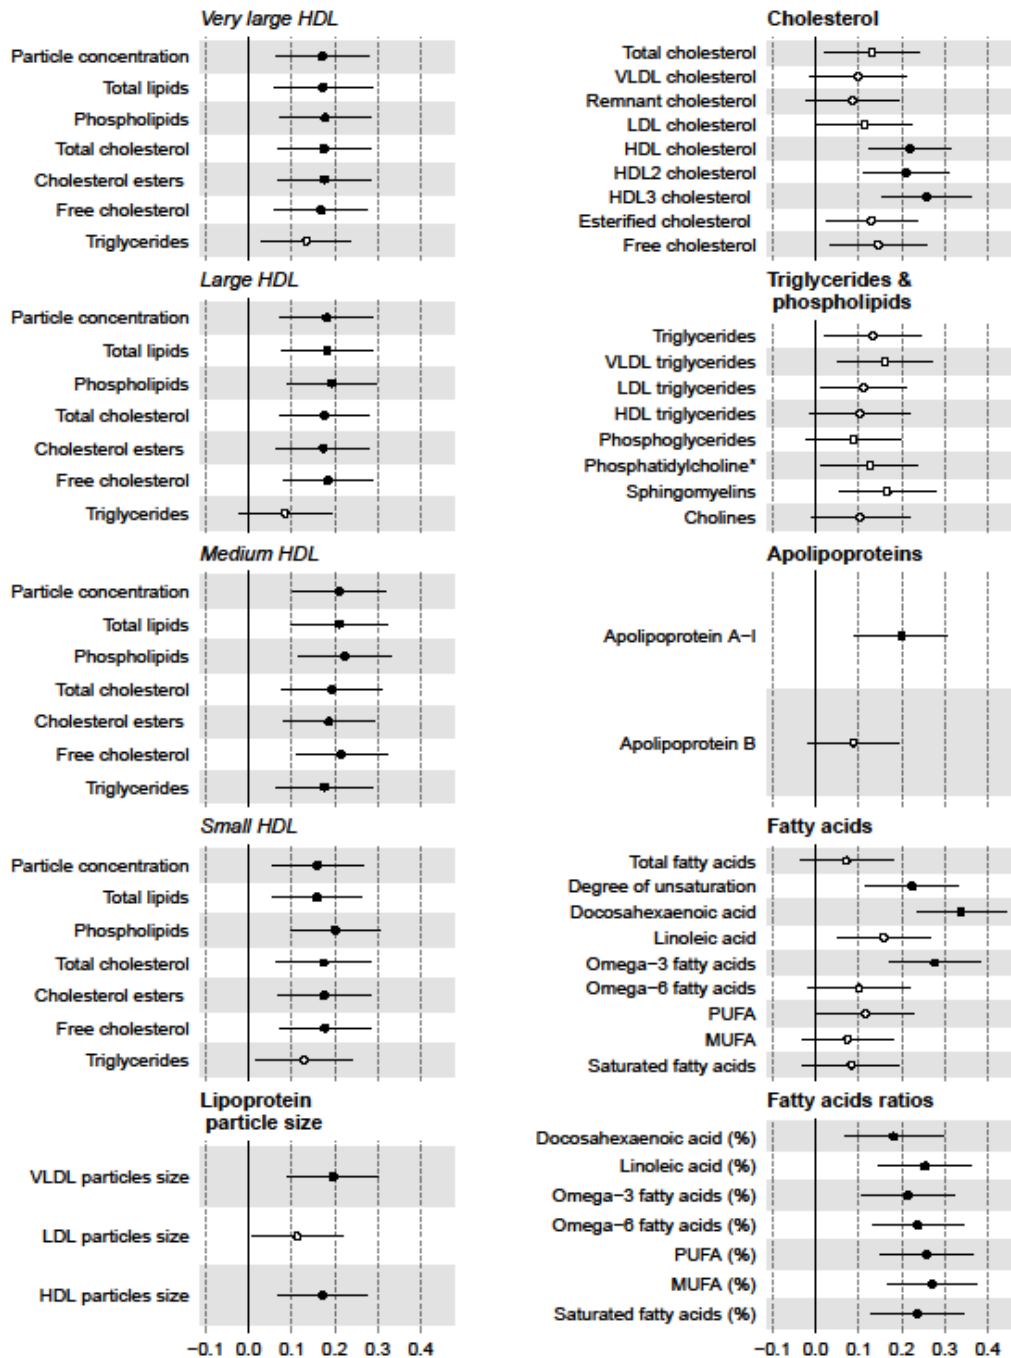

Correlation between metabolites within couples



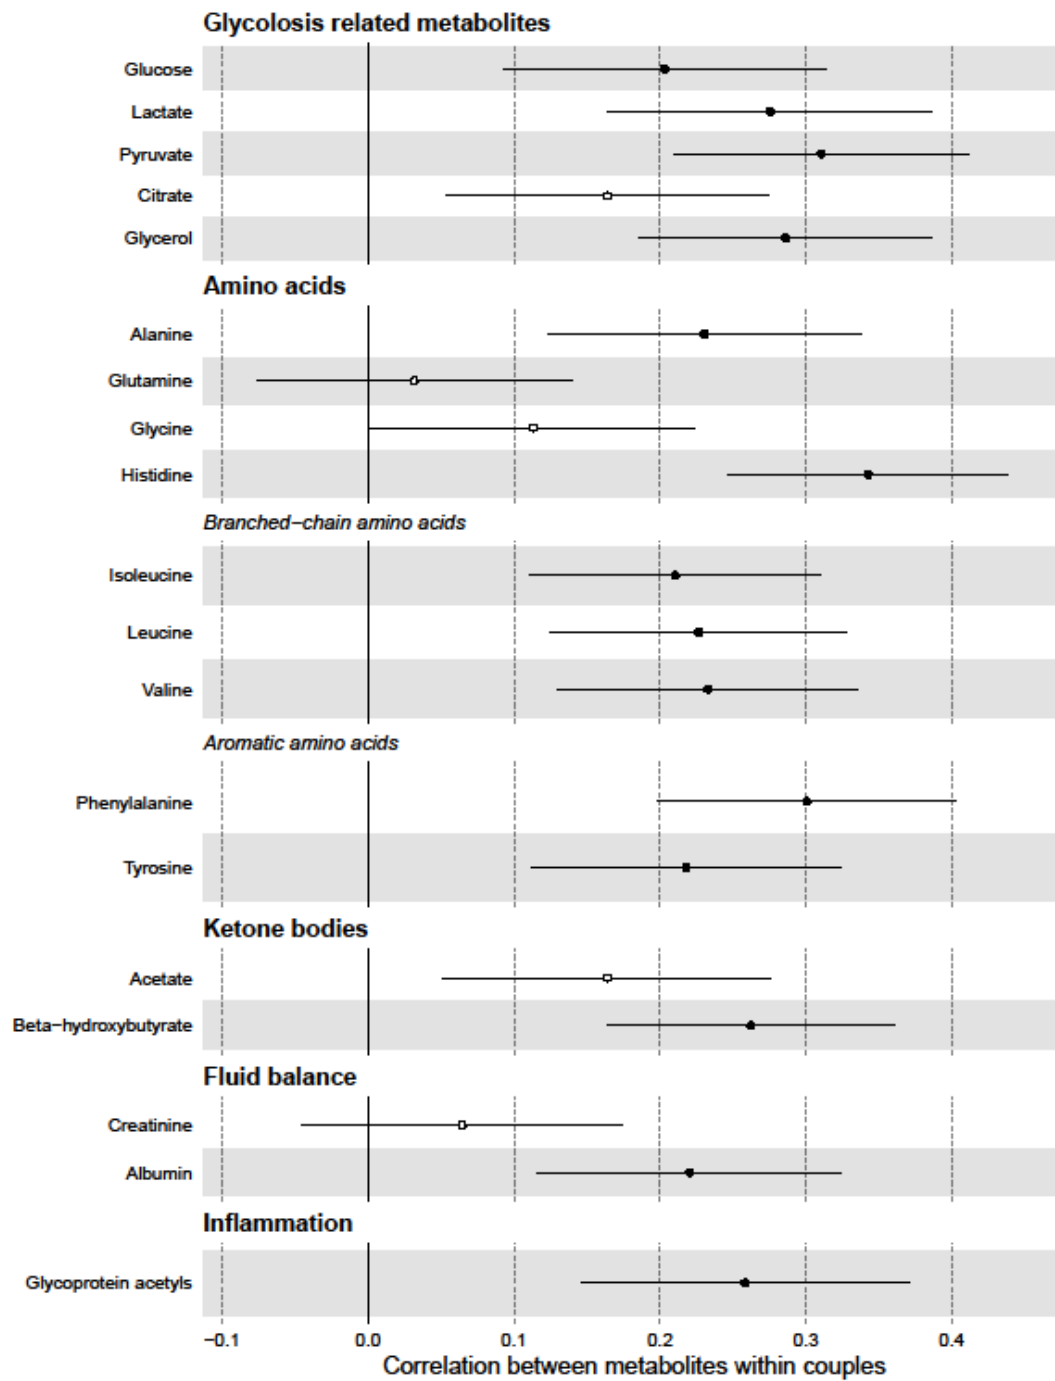

**Supplemental Figure S2. Adjusted correlations of metabolic measures in couples awaiting IVF.**

Pearson correlation coefficients and 95%CI of male and female linear regression residuals after sex-specific adjustment for age, educational attainment, ever smoking, physical activity, family history of cardiometabolic disease, alcohol consumption, BMI, and ethnicity.

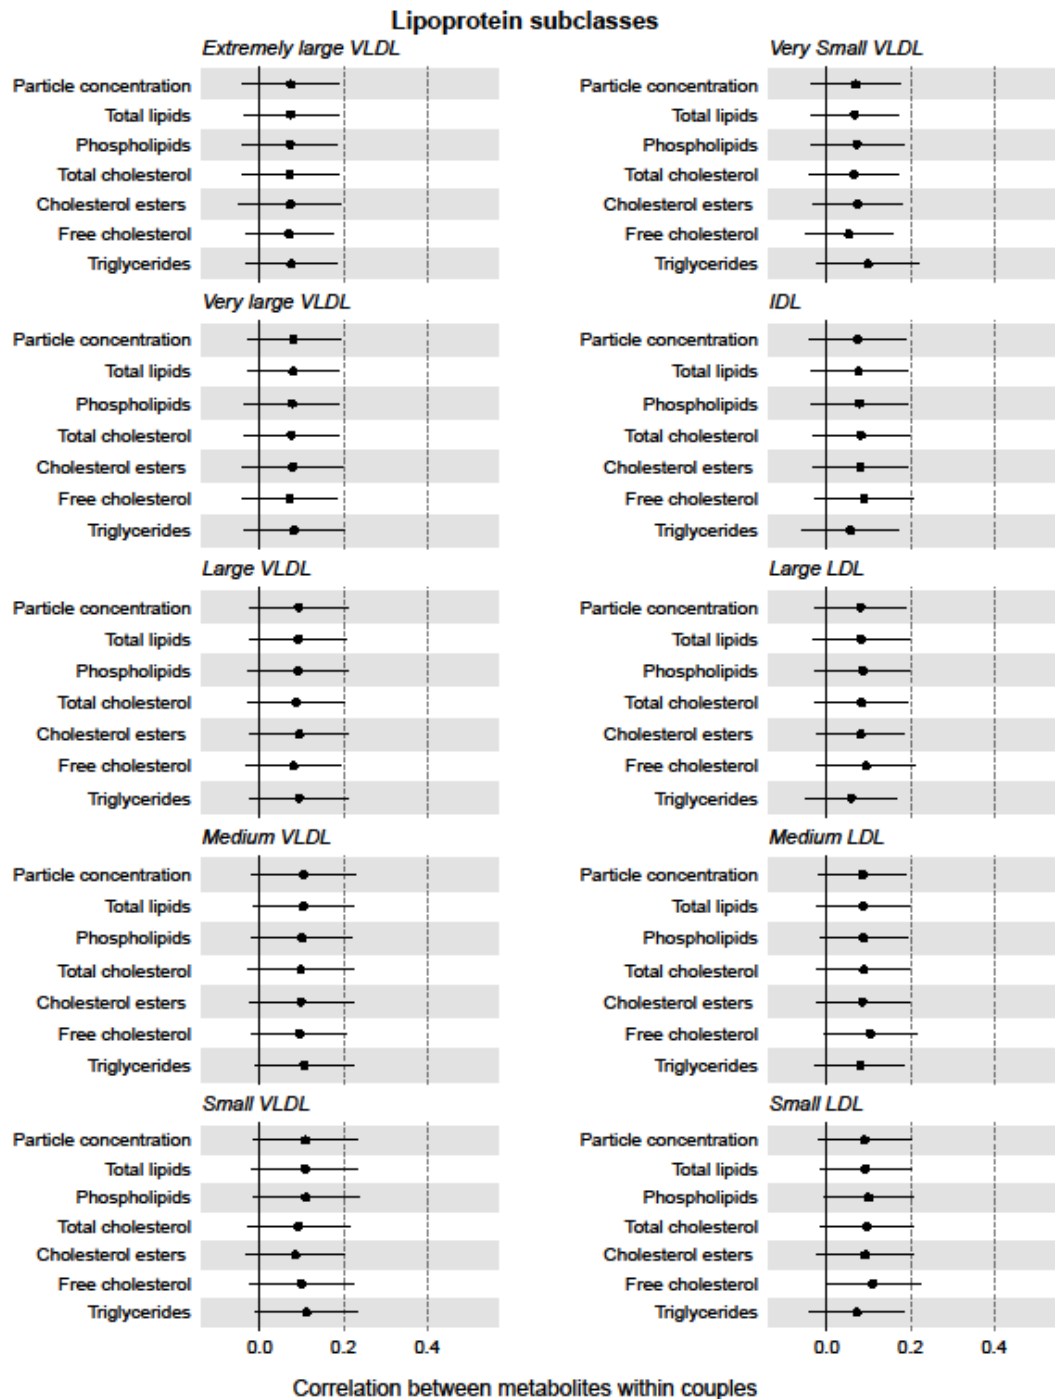

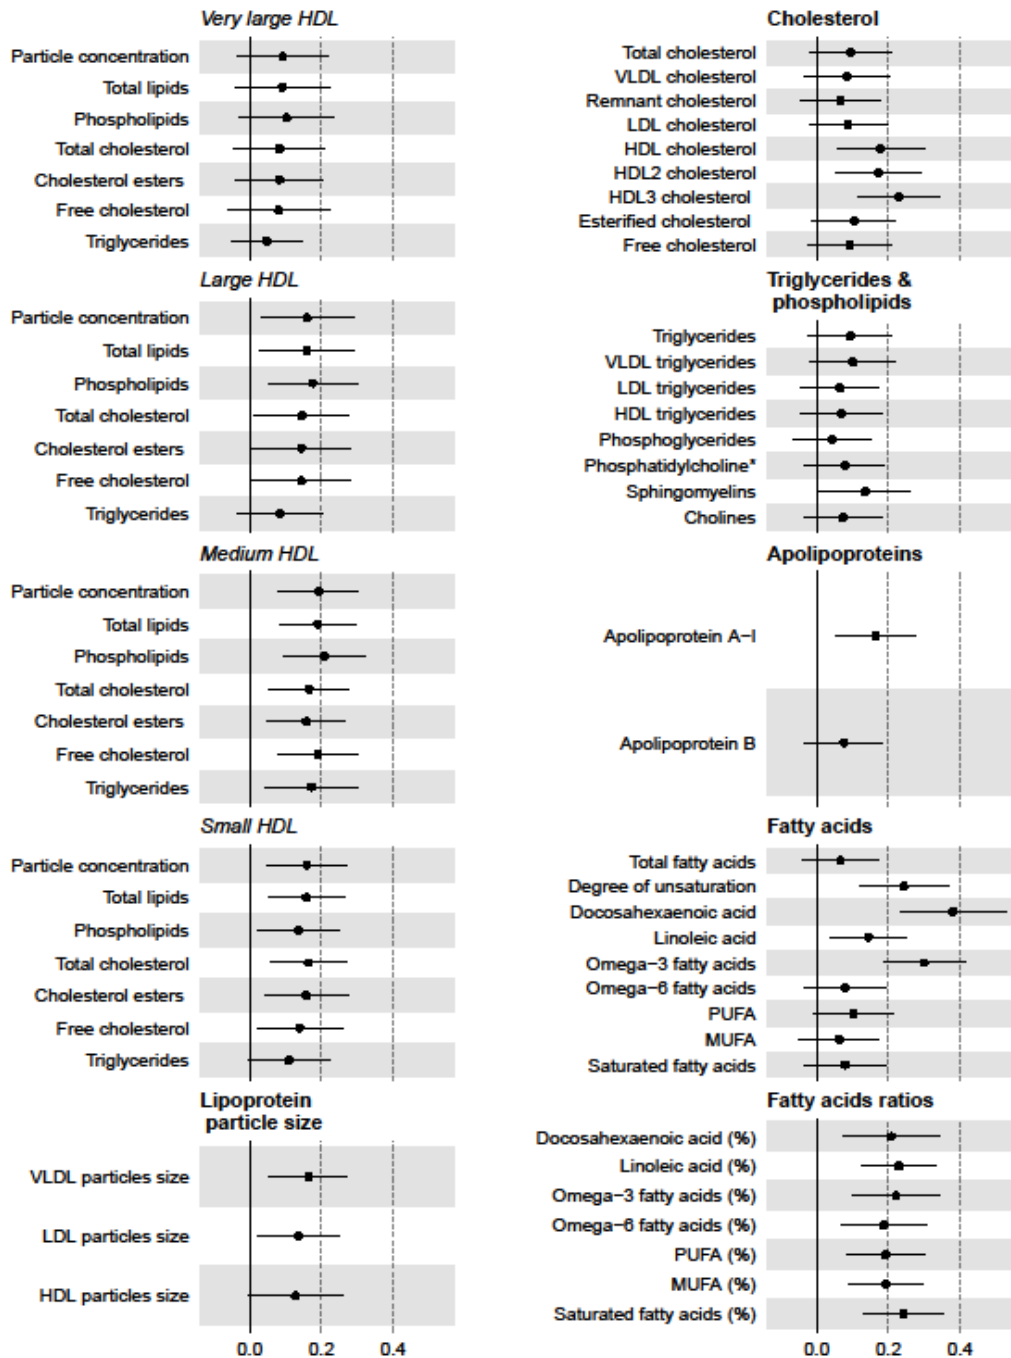

Correlation between metabolites within couples

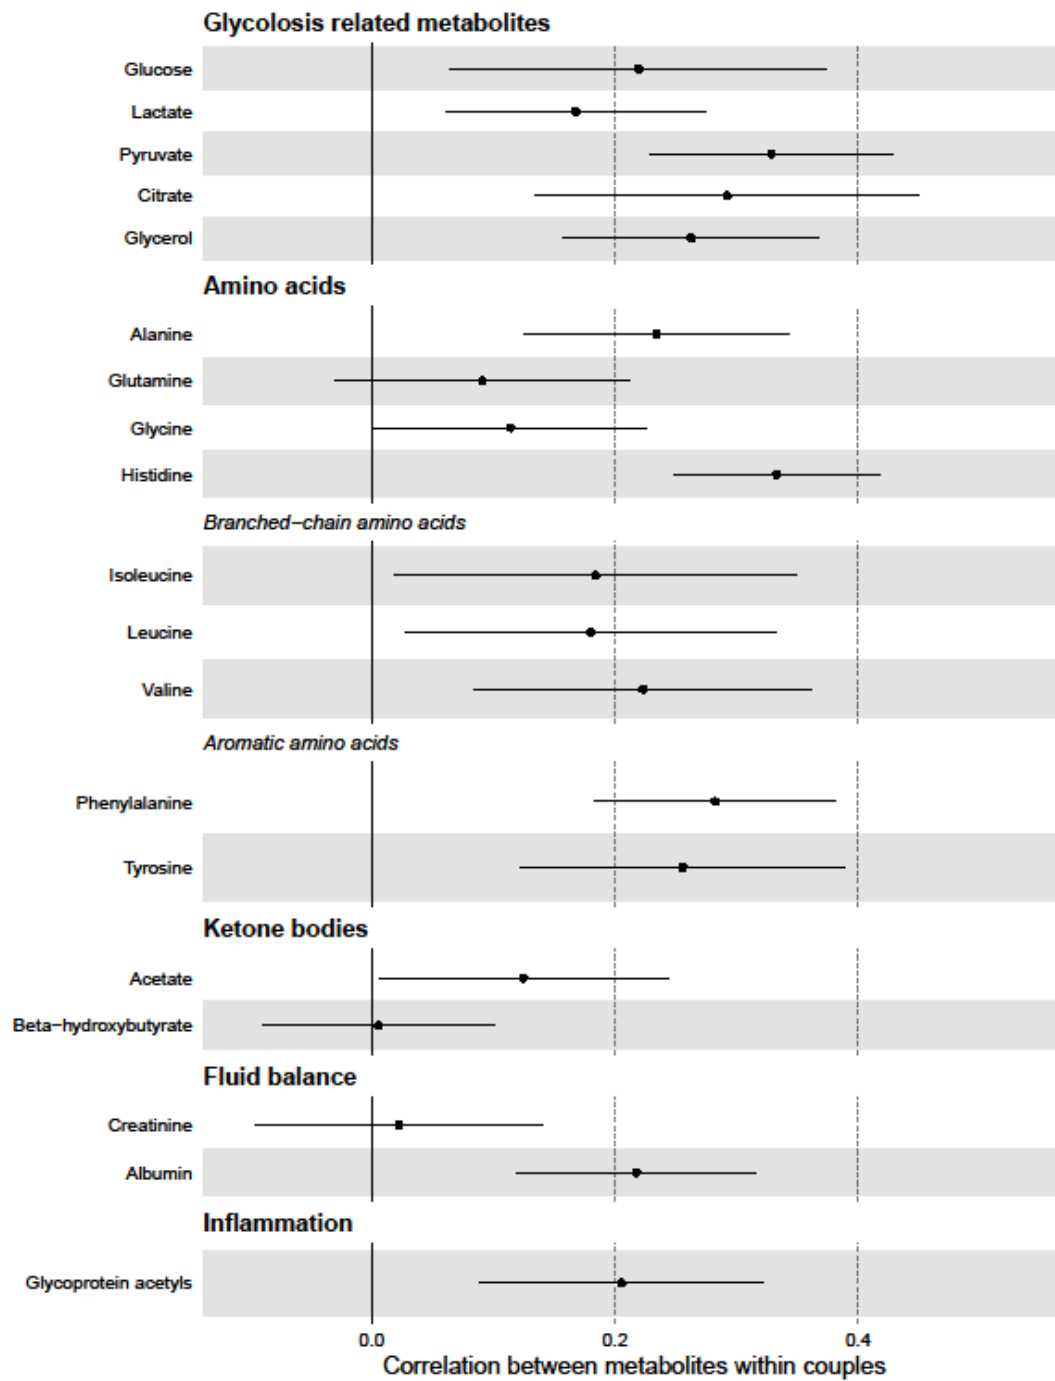

**Supplemental Figure S3. Correlations of metabolic measures in couples awaiting IVF using quantile regression.**

Pearson correlation coefficients and 95%CI of male and female quantile regression residuals after sex-specific adjustment for age, educational attainment, ever smoking, physical activity, family history of cardiometabolic disease, alcohol consumption, BMI, and ethnicity.

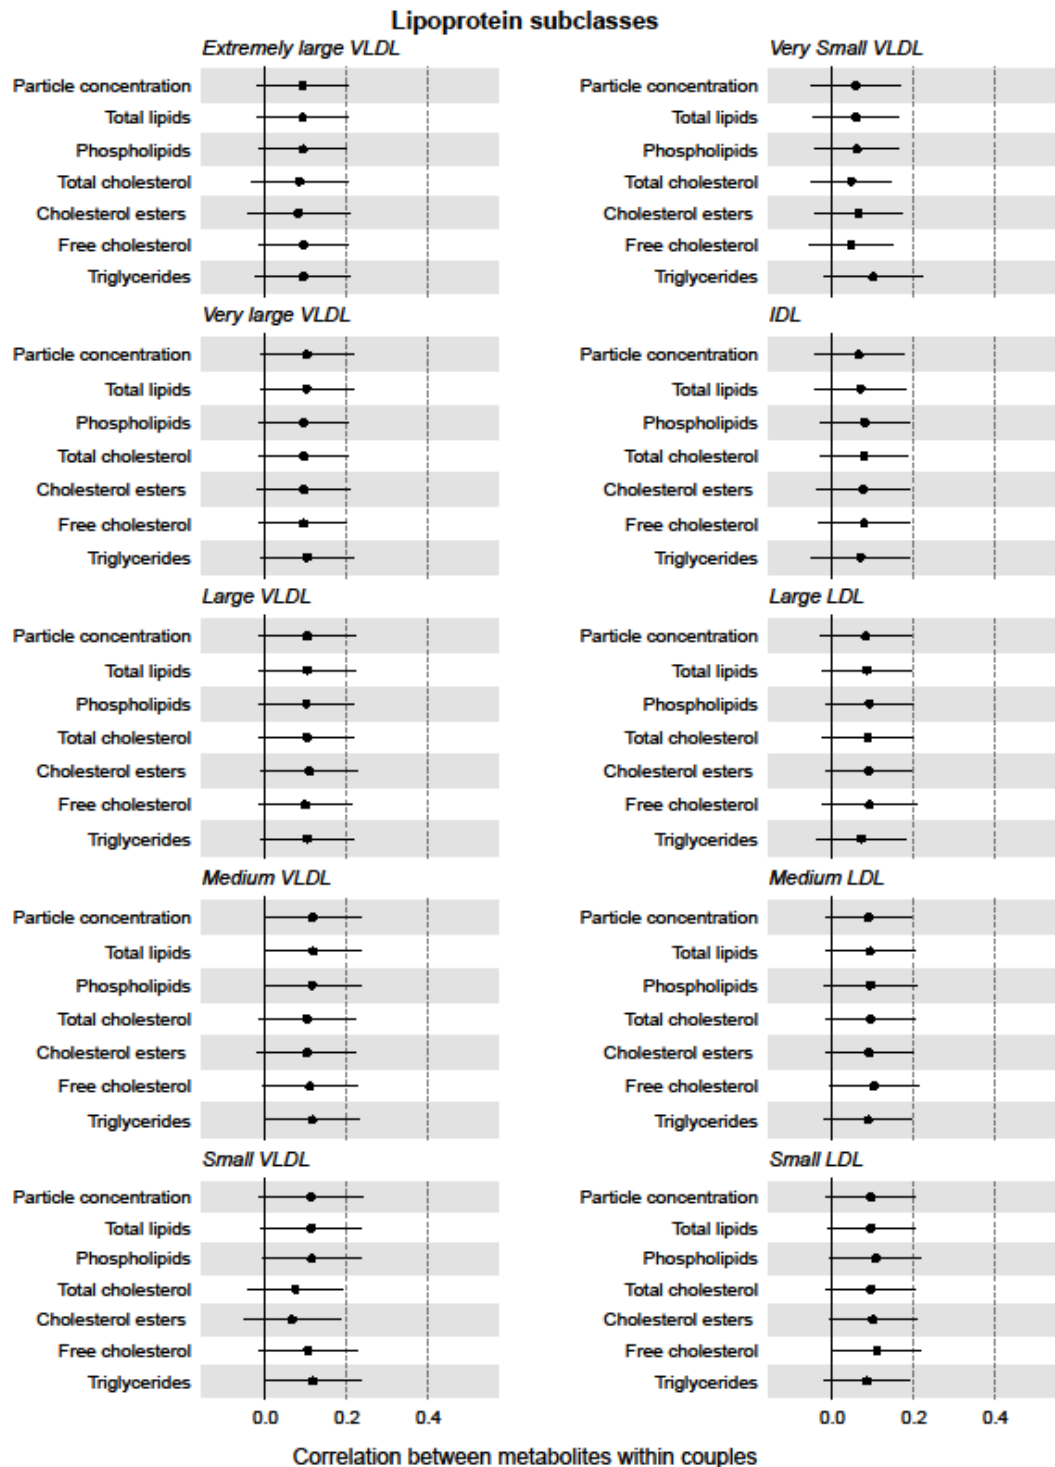

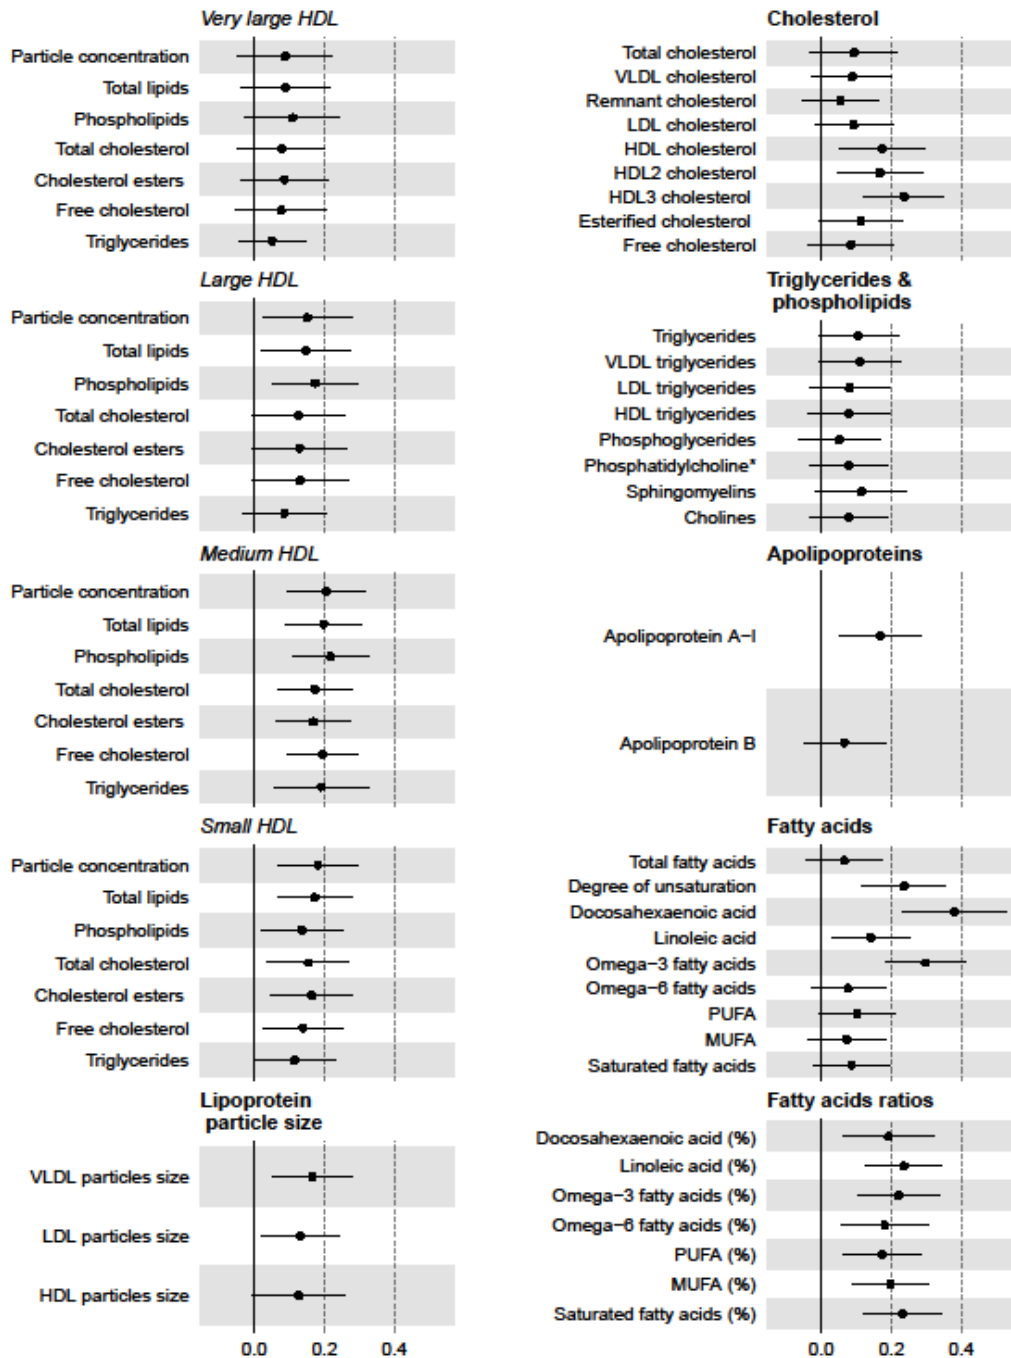

Correlation between metabolites within couples

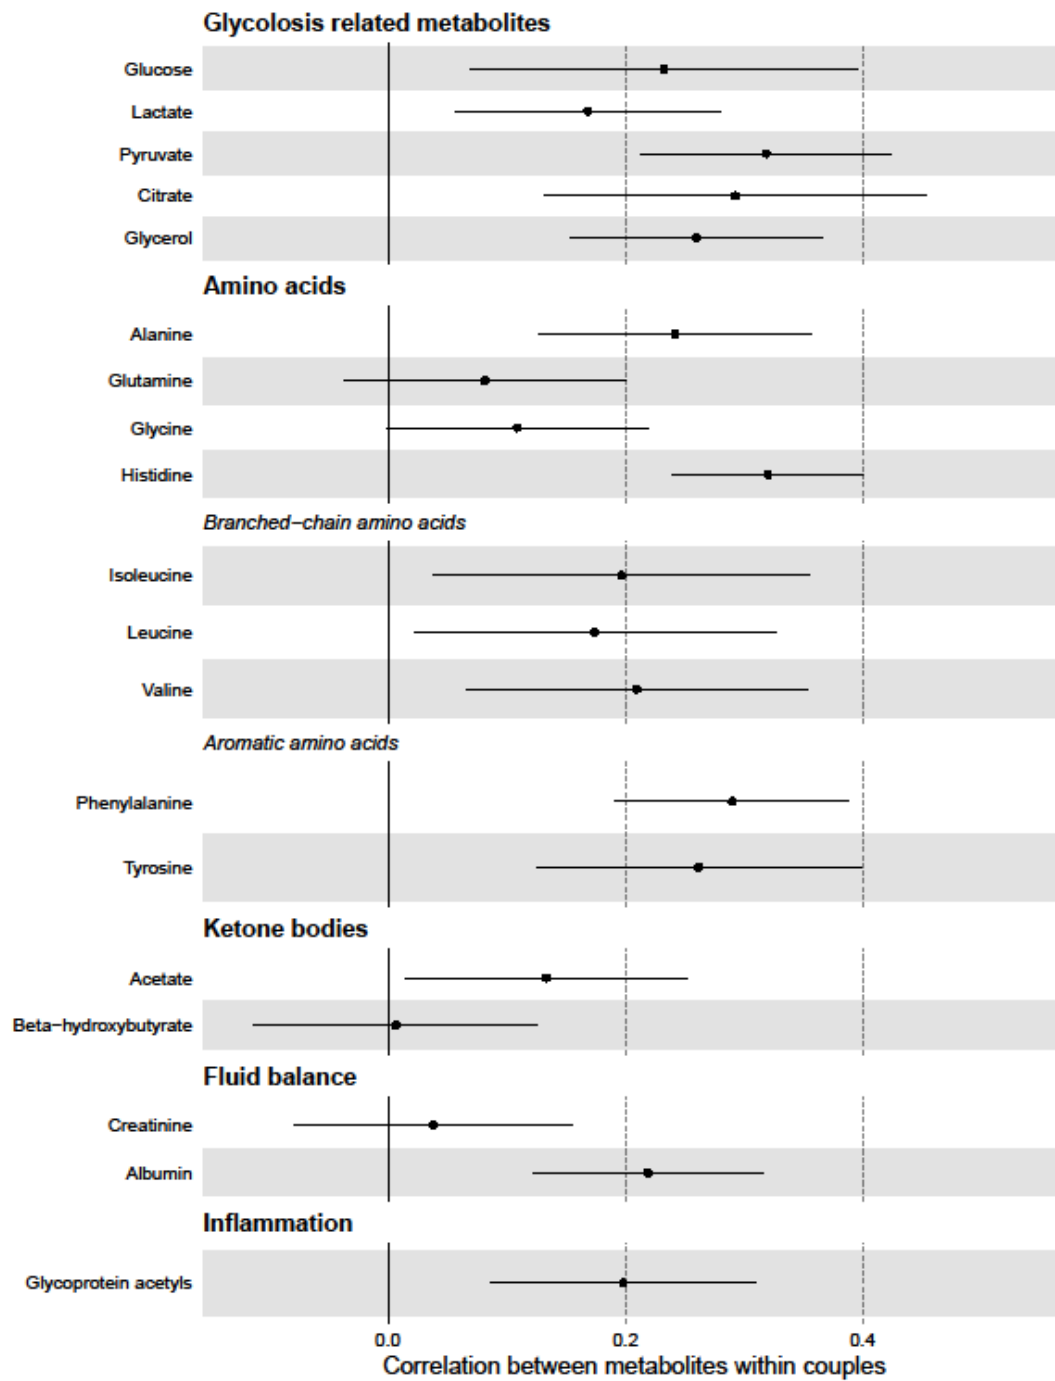

Supplement: 41598_2021_531_MOESM2_ESM.pdf [file 41598_2021_531_MOESM2_ESM.pdf]
